1                                   **Recipient-biased competition for a cross-fed nutrient is required**

2                                                           **for coexistence of microbial mutualists**

3

4

5   Running title: Biased competition within a mutualism

6   Alexandra L. McCully, Breah LaSarre, James B. McKinlay<sup>#</sup>

7   <sup>#</sup>Corresponding author. 1001 E 3<sup>rd</sup> Street, Jordan Hall, Bloomington, IN 47405

8   Phone: 812-855-0359

9   Email: [jmckinla@indiana.edu](mailto:jmckinla@indiana.edu)

10   **Conflict of interest.**

11   The authors declare no conflict of interest.

12 **Abstract.** Many mutualistic microbial relationships are based on the exchange of nutrients, or cross-  
13 feeding. Traditionally, cross-feeding interactions are viewed as being unidirectional from the producer to  
14 the recipient. This is likely true when a cross-fed nutrient is a waste-product of the producer's  
15 metabolism. However, in some cases the nutrient holds value for both the producer and the recipient. In  
16 such cases, there is potential for reacquisition of a valuable cross-fed nutrient by producers in a  
17 population, essentially leading to competition against the recipients. The consequences of inter-partner  
18 competition for cross-fed nutrients on mutualism dynamics have not been considered. We investigated the  
19 effects of such competition on a mutualism using a synthetic anaerobic coculture pairing fermentative  
20 *Escherichia coli* and phototrophic *Rhodospseudomonas palustris*. In this coculture, *E. coli* excretes waste  
21 organic acids that serve as a carbon source for *R. palustris*. In return, *R. palustris* cross-feeds *E. coli*  
22 ammonium ( $\text{NH}_4^+$ ), a valuable nitrogen source that both species in the mutualism prefer. To interrogate  
23 the impact of inter-partner competition, we varied the relative affinities for  $\text{NH}_4^+$  in each species in  
24 coculture, both theoretically using kinetic model simulations and experimentally using mutants lacking  
25  $\text{NH}_4^+$  transporters. We demonstrated that the recipient partner must have a competitive advantage in  
26 acquiring a valuable cross-fed nutrient in order for the mutualism to persist. Our results reveal that inter-  
27 partner competition shaping mutualism dynamics is not limited to environmental resources but rather can  
28 apply to the very metabolites that form the basis of the cooperative relationship.

29

30 **Significance.** Mutualistic relationships, particularly those based on nutrient cross-feeding, play crucial  
31 roles in the stability of diverse ecosystems and drive global biogeochemical cycles. Cross-fed nutrients  
32 within these systems can be either waste products valued only by one partner or nutrients that both  
33 partners value. Here, we explore how inter-partner competition for a valuable cross-fed nutrient impacts  
34 mutualism dynamics. We discovered that mutualism stability necessitates that the recipient must be  
35 competitive in obtaining the cross-fed nutrient. We propose that the requirement for recipient-biased  
36 competition is a general rule for mutualistic coexistence based on the transfer of mutually valuable  
37 resources, microbial or otherwise.

## 38 Introduction

39 Mutualistic cross-feeding of resources between microbes can have important societal impacts ranging  
40 from affecting host health (1, 2) to driving global biogeochemical cycles (3–6). Cross-fed metabolites are  
41 often regarded as nutrients due to the value they provide to a dependent partner, hereon called the  
42 recipient. However, for the partner producing the nutrient, hereon called the producer, a cross-fed  
43 nutrient's value can vary. On one extreme, the cross-fed nutrient is valued by the recipient but holds no  
44 value for the producer, as is the case for fermentative waste products (7–10). In other cases, a cross-fed  
45 nutrient holds value for the producer, as is the case for vitamin B<sub>12</sub> (6, 11, 12) and ammonium (NH<sub>4</sub><sup>+</sup>) (13,  
46 14), which a producer can usually use to support its own growth. Such valuable cross-fed nutrients are  
47 subject to partial privatization (15), wherein the producer has mechanisms to retain a portion of the  
48 nutrient pool for itself. We wondered whether these mechanisms for partial privatization could lead to  
49 competition between partner populations for a mutually valuable cross-fed nutrient. While competition  
50 within mutualisms for exogenous limiting resources has been recognized to influence mutualism stability  
51 (8, 16–19), most mutualism cross-feeding studies only consider unidirectional transfer from producer to  
52 recipient. To the best of our knowledge competition for valuable cross-fed nutrients between producer  
53 and recipient populations has never been addressed.

54 One prominent example of cross-feeding that could involve competition between mutualistic partners  
55 is NH<sub>4</sub><sup>+</sup> excretion by N<sub>2</sub>-fixing bacteria (Fig. 1A), hereon called N<sub>2</sub>-fixers (13, 14). During N<sub>2</sub> fixation, the  
56 enzyme nitrogenase converts N<sub>2</sub> gas into 2 NH<sub>3</sub> (20). In an aqueous environment, NH<sub>3</sub> is in equilibrium  
57 with NH<sub>4</sub><sup>+</sup>. At neutral pH, NH<sub>4</sub><sup>+</sup> is the predominant form but small amounts of NH<sub>3</sub> can potentially leave  
58 the cell by diffusion across the membrane (21) (Fig. 1B). This extracellular NH<sub>3</sub> is then available to  
59 neighboring microbes, including clonal N<sub>2</sub>-fixers, as NH<sub>3</sub>/NH<sub>4</sub><sup>+</sup> is a preferred nitrogen source for most  
60 microbes. At concentrations above 20 μM, NH<sub>3</sub> can be acquired by passive diffusion; below 20 μM, NH<sub>4</sub><sup>+</sup>  
61 is bound and transported as NH<sub>3</sub> by AmtB transporters (Fig. 1B) (22). AmtB-like transporters are  
62 conserved throughout all domains of life (23). There is growing evidence that AmtB is used by N<sub>2</sub>-fixers  
63 to recapture NH<sub>3</sub> lost by passive diffusion, as ΔAmtB mutants accumulate NH<sub>4</sub><sup>+</sup> in culture supernatants

64 (24–26). Thus, during the transfer of  $\text{NH}_4^+$  from  $\text{N}_2$ -fixers to mutualistic partners, AmtB could allow  
65 individual producer cells to compete against recipient cells for  $\text{NH}_4^+$ .

66 Assessing how competition between mutualistic partners for a cross-fed nutrient impacts a mutualism  
67 would require a level of experimental control not found in most natural settings. However, synthetic  
68 microbial communities, or cocultures, are well-suited to address such questions (27–29). We previously  
69 developed a bacterial coculture wherein coexistence and coupled growth of two species is stabilized by  
70 mutualistic cross-feeding (Fig. 1A) (26). In this coculture, *Escherichia coli* (*Ec*) ferments sugars into  
71 waste organic acids, providing essential carbon and electrons to a genetically engineered  
72 *Rhodospseudomonas palustris* (*Rp*) strain (Nx). In return *R. palustris* Nx excretes low micromolar  
73 amounts of  $\text{NH}_4^+$ , providing essential nitrogen for *E. coli* (26).  $\text{NH}_4^+$  excretion by *R. palustris* Nx is due to  
74 the genetic deletion of the Q-linker region of NifA, the master transcriptional regulator of nitrogenase  
75 (30). This mutation causes constitutive nitrogenase activity even in the presence of  $\text{NH}_4^+$ , a compound  
76 that normally inhibits nitrogenase (31, 32). We previously established that net  $\text{NH}_4^+$  excretion levels are  
77 an important driver of coculture dynamics (26, 33). As  $\text{NH}_4^+$  is a preferred nitrogen source for both *E. coli*  
78 (the recipient) and *R. palustris* (the producer), the coculture is well suited to address how competition for  
79 a cross-fed resource influences mutualism dynamics.

80 Here, we demonstrate that inter-partner competition for a cross-fed nutrient,  $\text{NH}_4^+$ , plays a direct role  
81 in maintaining coexistence. Using both kinetic modeling and genetic manipulation, we determined that  
82 successful coexistence of mutualistic partners depends on their relative affinities for  $\text{NH}_4^+$ . Insufficient  
83 competition by *E. coli* for  $\text{NH}_4^+$  resulted in a collapse of the mutualism. Mutualism collapse could be  
84 delayed or potentially avoided through higher net  $\text{NH}_4^+$  excretion by *R. palustris* or increased *E. coli*  
85 population size. As a general rule, competition for a cross-fed nutrient in an obligate mutualism must be  
86 biased in favor of the recipient to avoid extinction of both partner populations.

## 87 Results

88 **Competition for cross-fed  $\text{NH}_4^+$  is predicted to shape mutualism population dynamics.** Our coculture  
89 features cross-feeding of both waste products and a mutually valuable nutrient (Fig 1A). Cross-fed  
90 organic acids are excreted as an *E. coli* waste product and are thus only useful to *R. palustris*. In contrast,  
91  $\text{NH}_4^+$  fixed by *R. palustris* Nx is essential for growth of both species in coculture; *R. palustris* uses a  
92 portion of the  $\text{NH}_4^+$  for its own biosynthesis and excretes  $\text{NH}_4^+$  for use as a nitrogen source by *E. coli*.  
93 However, *R. palustris* prefers  $\text{NH}_4^+$  as a nitrogen source for growth (31), thus it is possible that  
94 individuals within the *R. palustris* Nx population also take up and assimilate excreted  $\text{NH}_4^+$ . We  
95 hypothesized that competition for  $\text{NH}_4^+$  between *R. palustris* producer and *E. coli* recipient populations  
96 could skew species ratios and potentially disrupt mutualism stability. To test whether competition for  
97 cross-fed  $\text{NH}_4^+$  could affect mutualism population dynamics we first used a mathematical model  
98 describing our coculture, SyFFoN (26, 33). SyFFoN simulates population and metabolic trends in batch  
99 cocultures using Monod model equations with experimentally-determined parameter values. Previous  
100 versions described  $\text{NH}_4^+$  uptake kinetics for *E. coli* but not for *R. palustris* (26, 33). We therefore  
101 amended SyFFoN to include an *R. palustris* uptake affinity ( $K_M$ ) for  $\text{NH}_4^+$  and higher *R. palustris*  
102 maximum growth rate ( $\mu_{MAX}$ ) when  $\text{NH}_4^+$  is used (Supplementary Table 1). We then simulated batch  
103 cocultures wherein the two species have different relative affinities for  $\text{NH}_4^+$  (Fig. 2). The model  
104 predicted that when the *R. palustris* affinity for  $\text{NH}_4^+$  is low relative to that of *E. coli* ( $Rp:Ec < 1$ ), there is  
105 coexistence as enough  $\text{N}_2$  is converted to  $\text{NH}_4^+$  to support *R. palustris* growth and enough  $\text{NH}_4^+$  is  
106 excreted to support *E. coli* growth. However, when the *R. palustris* affinity for  $\text{NH}_4^+$  is high relative to  
107 that of *E. coli* ( $Rp:Ec > 1$ ), *E. coli* growth is no longer supported, likely because *E. coli* cannot compete  
108 for excreted  $\text{NH}_4^+$ . Even when the model predicted no *E. coli* growth, high *R. palustris* cell densities were  
109 predicted (Fig. 2). These high *R. palustris* densities occurred because the model allows for persistent low  
110 levels of organic acid cross-feeding stemming from *E. coli* maintenance metabolism even when *E. coli* is  
111 not growing (33).

112

113 **Genetic disruption of AmtB  $\text{NH}_4^+$  transporters affects mutualistic partner frequencies.** Bacterial  
114 cells are known to generally acquire  $\text{NH}_4^+$  through two mechanisms: passive diffusion of  $\text{NH}_3$  or uptake  
115 by transporters called AmtB (Fig. 1A). We hypothesized that genetic disruption of AmtB activity in either  
116 species would result in a lower affinity for  $\text{NH}_4^+$  in that species and thus allow us to test how relative  
117 affinity for  $\text{NH}_4^+$  impacts coculture dynamics. We generated  $\Delta\text{AmtB}$  mutants of both *E. coli* and *R.*  
118 *palustris* and first characterized the impact of the mutations in monoculture. In monocultures with excess  
119  $\text{NH}_4\text{Cl}$  (15 mM), *E. coli*  $\Delta\text{AmtB}$  grew at an equivalent growth rate and produced an identical  
120 fermentation profile as wild-type (WT) *E. coli* (Supplementary Fig. 1). Our observations are consistent  
121 with those previously made with *E. coli*  $\Delta\text{AmtB}$  mutants where growth defects were only apparent at  
122  $\text{NH}_4^+$  concentrations below 20  $\mu\text{M}$  (22). In *R. palustris* monocultures with  $\text{N}_2$  as the nitrogen source, *R.*  
123 *palustris*  $\Delta\text{AmtB}$  growth trends were equivalent to those of the parent strain; however, *R. palustris*  
124  $\Delta\text{AmtB}$  excreted more  $\text{NH}_4^+$  than the parent strain and about a third of that excreted by *R. palustris* Nx  
125 (Supplementary Fig. 1C and D).  $\text{NH}_4^+$  excretion by *R. palustris*  $\Delta\text{AmtB}$  could be due to a decreased  
126 ability to reacquire  $\text{NH}_4^+$  lost by diffusion, resulting in increased net  $\text{NH}_4^+$  excretion overall.  
127 Alternatively, we considered that  $\text{NH}_4^+$  excretion by *R. palustris*  $\Delta\text{AmtB}$  could be due to improper  
128 regulation of nitrogenase. Proper regulation of nitrogenase requires AmtB in several  $\text{N}_2$ -fixers, for  
129 example to induce post-translational inhibition, or switch-off, of nitrogenase in response to  $\text{NH}_4^+$  (25, 34).  
130 We tested whether *R. palustris*  $\Delta\text{AmtB}$  exhibits  $\text{NH}_4^+$ -induced switch-off of nitrogenase by adding  $\text{NH}_4\text{Cl}$   
131 to exponentially growing cultures and measuring  $\text{H}_2$  production, an obligate product of the nitrogenase  
132 reaction (35), as a proxy for nitrogenase activity. Upon  $\text{NH}_4\text{Cl}$  addition,  $\text{H}_2$  production stopped in *R.*  
133 *palustris*  $\Delta\text{AmtB}$  cultures. In contrast, it only slowed slightly in *R. palustris* Nx cultures (Supplementary  
134 Fig. 2), consistent with previous observations that strains with NifA\* are incompetent for  $\text{NH}_4^+$ -induced  
135 switch-off (31, 32). Like the parent strain, *R. palustris*  $\Delta\text{AmtB}$  did not produce  $\text{H}_2$  when grown with  
136  $\text{NH}_4^+$ , unlike *R. palustris* Nx (Supplementary Fig. 3). These observations demonstrate that *R. palustris*  
137  $\Delta\text{AmtB}$  is competent for  $\text{NH}_4^+$ -induced nitrogenase shut-off and indicate that  $\text{NH}_4^+$  excretion by *R.*  
138 *palustris*  $\Delta\text{AmtB}$  is due to a poor ability to reacquire  $\text{NH}_4^+$  lost by diffusion.

139 We then compared the growth trends of cocultures containing either WT *E. coli* or *E. coli*  
140  $\Delta$ AmtB, paired with either *R. palustris*  $\Delta$ AmtB, *R. palustris* Nx, or *R. palustris* Nx $\Delta$ AmtB, the latter of  
141 which we previously determined to exhibit 3-fold higher  $\text{NH}_4^+$ -excretion levels than the Nx strain in  
142 monoculture (26). For each *R. palustris* partner, cocultures with *E. coli*  $\Delta$ AmtB grew slower than  
143 cocultures with WT *E. coli* (Fig. 3A,B). *E. coli*  $\Delta$ AmtB also constituted a lower percentage of the  
144 population and achieved lower cell densities compared to WT *E. coli* when paired with the same *R.*  
145 *palustris* strain (Fig. 3C). These lower frequencies suggest that *E. coli*  $\Delta$ AmtB was less competitive for  
146 excreted  $\text{NH}_4^+$  against *R. palustris*.

147 Consistent with previous work, *R. palustris* Nx $\Delta$ AmtB supported higher percentages and cell  
148 densities of WT *E. coli* (Fig. 3C) due to a high level of  $\text{NH}_4^+$  excretion (Supplementary Fig. 1D) (26). At  
149 high  $\text{NH}_4^+$  excretion levels from *R. palustris* Nx $\Delta$ AmtB, faster *E. coli* growth leads to rapid organic acid  
150 accumulation, which acidifies the environment, inhibits *R. palustris* growth, and leaves organic acids  
151 unconsumed (26) (Fig. 3D). Surprisingly, although *R. palustris*  $\Delta$ AmtB excreted less  $\text{NH}_4^+$  than *R.*  
152 *palustris* Nx in monoculture, *R. palustris*  $\Delta$ AmtB supported a higher WT *E. coli* population in coculture  
153 and unconsumed organic acids remained after cessation of growth (Fig. 3C, D). Unlike Nx strains, which  
154 have constitutive nitrogenase activity due to a mutation in the transcriptional activator NifA (30), *R.*  
155 *palustris*  $\Delta$ AmtB has a WT copy of NifA. Thus, *R. palustris*  $\Delta$ AmtB can likely still regulate nitrogenase  
156 expression, and thereby its activity, in response to nitrogen starvation. We hypothesized that *R. palustris*  
157  $\Delta$ AmtB experiences a degree of nitrogen starvation when cocultured with WT *E. coli* but not when in  
158 monoculture. In coculture, WT *E. coli* would consume the excreted  $\text{NH}_4^+$  and thereby limit reacquisition  
159 of  $\text{NH}_4^+$  by *R. palustris*  $\Delta$ AmtB; in an *R. palustris*  $\Delta$ AmtB monoculture any lost  $\text{NH}_4^+$  would remain  
160 available to *R. palustris*. To test whether coculture conditions stimulated higher nitrogenase activity, we  
161 quantified nitrogenase activity in both monocultures and cocultures using an acetylene reduction assay. In  
162 agreement with our hypothesis, we found that *R. palustris*  $\Delta$ AmtB had increased nitrogenase activity in  
163 coculture conditions compared to monocultures whereas *R. palustris* Nx, which exhibits constitutive  
164 nitrogenase activity, showed similar levels in both conditions (Supplementary Fig. 4). As *R. palustris*

165  $\Delta$ AmtB lacks an ammonium transporter, allowing WT *E. coli* to outcompete *R. palustris* for excreted  
166  $\text{NH}_4^+$ , the relatively high WT *E. coli* population in coculture with *R. palustris*  $\Delta$ AmtB is likely supported  
167 by both higher  $\text{NH}_4^+$  cross-feeding due to increased nitrogenase activity and decreased *R. palustris*  
168 affinity for  $\text{NH}_4^+$ .

169 ***E. coli* must have a competitive advantage for  $\text{NH}_4^+$  acquisition to avoid extinction of both partners.**

170 Our coculture has been shown to support reproducible trends in response to both environmental and  
171 genetic perturbations, including limiting  $\text{NH}_4^+$  cross-feeding (26, 33). We were therefore surprised to  
172 observe that cocultures of *R. palustris*  $\Delta$ AmtB paired with *E. coli*  $\Delta$ AmtB showed little growth when  
173 started from a single colony of each species (Fig. 3), a method that we routinely use to initiate cocultures  
174 (26, 33). We hypothesized that when both species lack AmtB, *R. palustris* might have a greater affinity  
175 for  $\text{NH}_4^+$  than *E. coli*, thereby preventing *E. coli* growth as predicted in our simulations (Fig. 2). Even  
176 though our simulations predicted *R. palustris* growth when it outcompetes *E. coli* for  $\text{NH}_4^+$  (Fig. 2),  
177 SyFFoN likely underestimates the time required to achieve these densities, if they would be achieved at  
178 all, as SyFFoN does not take into account cell death, which is known to occur when *E. coli* growth is  
179 prevented in coculture (33).

180 We reasoned that if *E. coli*  $\Delta$ AmtB was being outcompeted by *R. palustris*  $\Delta$ AmtB for excreted  
181  $\text{NH}_4^+$ , then starting with a larger *E. coli*  $\Delta$ AmtB population would increase the probability that any given  
182 *E. coli* cell would acquire  $\text{NH}_4^+$  versus *R. palustris*. To test this hypothesis we simulated batch cultures  
183 with different starting species ratios and setting the *R. palustris* affinity for  $\text{NH}_4^+$  to be far higher than that  
184 of *E. coli* ( $R_p:Ec = 1000$ ). The model predicted that when *E. coli* was inoculated at equal or higher  
185 densities than *R. palustris*, the coculture would grow more (Fig. 4A). We tested this prediction  
186 experimentally using cocultures of *R. palustris*  $\Delta$ AmtB paired with *E. coli*  $\Delta$ AmtB started at different cell  
187 densities. Greater coculture growth was observed when cocultures were inoculated with equal or higher  
188 relative densities of *E. coli*  $\Delta$ AmtB versus *R. palustris*  $\Delta$ AmtB (Fig. 4B, C). These data together suggest  
189 that poor coculture growth is due to *E. coli*  $\Delta$ AmtB having a lower  $\text{NH}_4^+$  affinity than *R. palustris*  
190  $\Delta$ AmtB.



191 We then sought to experimentally verify that *E. coli*  $\Delta$ AmtB strains are less competitive against  
192 *R. palustris* for  $\text{NH}_4^+$  acquisition, even when *R. palustris* lacks AmtB. To determine relative  $\text{NH}_4^+$   
193 affinities, we directly competed all possible *E. coli* and *R. palustris* strain combinations in cocultures  
194 where ample carbon was available for each species but the  $\text{NH}_4^+$  concentration was kept low; specifically,  
195 a small amount of  $\text{NH}_4^+$  was added every hour to bring the final  $\text{NH}_4^+$  concentration to 0.5  $\mu\text{M}$  (Fig. 5). In  
196 this competition assay, the species that is more competitive for  $\text{NH}_4^+$  should reach a higher cell density  
197 than the other species. In all cases, WT *E. coli* was more competitive for  $\text{NH}_4^+$  than *R. palustris*.  
198 However, each *R. palustris* strain was able to outcompete *E. coli*  $\Delta$ AmtB (Fig. 5), even though the *R.*  
199 *palustris* maximum growth rate is 4.6-times slower than that of *E. coli* (Supplementary Fig. 1). Even *R.*  
200 *palustris* strains lacking AmtB outcompeted *E. coli*  $\Delta$ AmtB (Fig. 5), suggesting that *R. palustris* has a  
201 higher affinity for  $\text{NH}_4^+$  than *E. coli* in the absence of AmtB. Thus, an inability of *E. coli* to compete  
202 against *R. palustris* for cross-fed  $\text{NH}_4^+$  likely explains why cocultures failed to grow when both partner  
203 populations lacked AmtB (Fig. 3).

204 The collapse of cocultures pairing *R. palustris*  $\Delta$ AmtB with *E. coli*  $\Delta$ AmtB made us question why  
205 cocultures pairing *R. palustris* Nx with *E. coli*  $\Delta$ AmtB did not collapse (Fig. 3), since *R. palustris* Nx  
206 possesses a functional AmtB and outcompeted *E. coli*  $\Delta$ AmtB for  $\text{NH}_4^+$  to a similar degree as in other  
207 pairings with *E. coli*  $\Delta$ AmtB (Fig. 5). We hypothesized that a relatively high  $\text{NH}_4^+$  excretion level by *R.*  
208 *palustris* Nx could compensate for a low *E. coli*  $\text{NH}_4^+$  affinity (Supplementary Fig. 1D). We therefore  
209 simulated cocultures with the *R. palustris* affinity for  $\text{NH}_4^+$  set high relative to that of *E. coli* ( $Rp:Ec =$   
210 1000) and varied the *R. palustris*  $\text{NH}_4^+$  excretion level (Fig. 6). Indeed, increasing *R. palustris*  $\text{NH}_4^+$   
211 excretion was predicted to overcome a low *E. coli* affinity for  $\text{NH}_4^+$  and support growth of both species  
212 (Fig. 6). However, at the highest levels of  $\text{NH}_4^+$  excretion, *R. palustris* growth was predicted to be  
213 inhibited due to rapid *E. coli* growth and subsequent production of organic acids that acidify the  
214 environment (Fig. 6) (26). These simulations suggest that *R. palustris* Nx, and likely Nx $\Delta$ AmtB as well,  
215 supported coculture growth with *E. coli*  $\Delta$ AmtB due to higher  $\text{NH}_4^+$  excretion levels (Supplementary Fig.

216 1D), whereas a combination of low  $\text{NH}_4^+$  excretion by *R. palustris*  $\Delta\text{AmtB}$  (Supplementary Fig. 1D) and  
217 a low affinity for  $\text{NH}_4^+$  by *E. coli*  $\Delta\text{AmtB}$  led to collapse of the mutualism in this pairing.

218 So far, we had only considered the effect of severe discrepancies in  $\text{NH}_4^+$  affinities between the two  
219 species (e.g., 1000-fold difference in  $K_M$  values in our simulations) as a mechanism leading to coculture  
220 collapse within the time period of a single culturing. However, we wondered if a subtle discrepancy in  
221  $\text{NH}_4^+$  affinities could lead to coculture collapse if given more time. The lack of growth in cocultures with  
222 *R. palustris*  $\Delta\text{AmtB}$  paired with *E. coli*  $\Delta\text{AmtB}$  made us question if other cocultures containing *E. coli*  
223  $\Delta\text{AmtB}$  were truly stable or not. We therefore simulated serial transfers of cocultures with partners having  
224 different relative  $\text{NH}_4^+$  affinities (Fig. 7A, B). At equivalent  $\text{NH}_4^+$  affinities (Fig. 7A), both species were  
225 predicted to be maintained over serial transfers. However, when the relative affinities approached a  
226 threshold (relative *Rp:Ec* = 2.75), cell densities of both species were predicted to decrease over serial  
227 transfers (Fig. 7B). This decline in coculture growth is due to *E. coli* being slowly but progressively  
228 outcompeted for  $\text{NH}_4^+$  by *R. palustris*. As the difference between the *R. palustris* and *E. coli* populations  
229 expands, *R. palustris* cells have a greater chance of acquiring  $\text{NH}_4^+$  than the smaller *E. coli* population,  
230 further starving *E. coli* for  $\text{NH}_4^+$  and simultaneously cutting off *R. palustris* from its supply of organic  
231 acids from *E. coli*.

232 The above prediction prompted us to investigate if cocultures pairing *R. palustris* with *E. coli*  
233  $\Delta\text{AmtB}$  were stable through serial transfers. We focused on cocultures with *R. palustris* Nx rather than *R.*  
234 *palustris* Nx $\Delta\text{AmtB}$  because *R. palustris* Nx has AmtB and would therefore be most likely to eventually  
235 outcompete *E. coli*  $\Delta\text{AmtB}$ . We serially transferred cocultures of *R. palustris* Nx paired with *E. coli*  
236  $\Delta\text{AmtB}$  and monitored final cell densities. Strikingly, we observed coculture collapse after eight serial  
237 transfers (Fig. 7C). This observation is in stark contrast to cocultures of *R. palustris* Nx paired with WT  
238 *E. coli*, which we have serially transferred for over 100 transfers with no extinction events (unpublished  
239 data). These results indicate that the recipient population must have a competitive advantage for a cross-  
240 fed nutrient versus the producer population to avoid mutualism collapse and potential extinction of both  
241 partner populations.

## 242 Discussion

243 Here we demonstrate that mutualistic partners can compete for a valuable cross-fed nutrient upon  
244 which the mutualistic interaction is based, in this case  $\text{NH}_4^+$ . This competition can impact partner  
245 frequencies and mutualism stability. Producer-biased competition for a cross-fed nutrient can render  
246 nutrient excretion levels insufficient for cooperative growth, as efficient nutrient reacquisition by the  
247 producer can starve the recipient, leading to tragedy of the commons (36). Conversely, recipient-biased  
248 competition for a cross-fed nutrient drives cooperative directionality in nutrient exchange and thereby  
249 promotes mutualism stability. One implication of these results is that inter-partner competition can  
250 influence the level of resource privatization. Within microbial interdependencies, partial privatization has  
251 primarily been thought to depend on mechanisms used by the producer to retain a portion of a mutually  
252 valuable resource (15). Our data indicate that for excreted resources having a transient availability to both  
253 mutualists, recipient acquisition mechanisms can also influence the level of privatization, as the  
254 competition impacts how much of a cross-fed resource will be shared versus re-acquired. In effect,  
255 recipient-biased competition avoids tragedy of the commons by enforcing partial privatization of a  
256 mutually valuable resource. The importance of the recipient having the upper hand in inter-partner  
257 competition likely applies to other synthetic cocultures and natural microbial mutualisms that are based  
258 on the cross-feeding of valuable nutrients, including amino acids (37, 38) and vitamin B<sub>12</sub> (6, 11). The  
259 same rule could also apply to inter-kingdom and non-microbial examples of cross-feeding (plants and  
260 pollinators, nutrient transfer between plants and bacteria or fungi (39)) and cooperative feeding (honey-  
261 bird and human harvesting of bee hives (40), cooperative hunting between grouper fish and moray eels  
262 (41)). In such cases, increased privatization of a cross-fed or shared resource, for example through  
263 producer-biased competition, could threaten the mutualism upon which both species depend (15, 39, 42).

264 In our system, AmtB transporters were crucial determinants of inter-partner competition for  $\text{NH}_4^+$ .  
265 We were intrigued to find that when both species lacked AmtB, *R. palustris* out-competed *E. coli* for  
266  $\text{NH}_4^+$  (Fig. 5) enough so to collapse the mutualism within a single culturing (Fig. 3). Whether by  
267 maximizing  $\text{NH}_4^+$  retention or re-acquisition, *R. palustris*, and perhaps other N<sub>2</sub>-fixers, might have

268 additional mechanisms aside from AmtB to minimize loss of  $\text{NH}_4^+$  as  $\text{NH}_3$ . These mechanisms could  
269 include a relatively low internal pH to favor  $\text{NH}_4^+$  over  $\text{NH}_3$ , negatively-charged surface features, or  
270 relatively high affinities by  $\text{NH}_4^+$  assimilating enzymes such as glutamine synthetase. There are several  
271 reasons why it would be beneficial for  $\text{N}_2$ -fixers to minimize  $\text{NH}_4^+$  loss. First,  $\text{N}_2$  fixation is expensive,  
272 both in terms of the enzymes involved (43) and the reaction itself, costing 16 ATP to convert one  $\text{N}_2$  into  
273 2  $\text{NH}_3$  (35). Passive loss of  $\text{NH}_3$  would only add to this cost, as more  $\text{N}_2$  would have to be fixed to  
274 compensate. Second, loss of  $\text{NH}_4^+$  could benefit nearby microbes competing against an  $\text{N}_2$ -fixer for  
275 separate limiting nutrients (14, 44). The possibility that  $\text{N}_2$ -fixers could have a superior ability to retain or  
276 acquire  $\text{NH}_4^+$  independently of AmtB is not farfetched. Bacteria are known to exhibit differential abilities  
277 to compete for nutrients. For example, iron acquisition commonly involves iron-binding siderophores, but  
278 siderophores can be chemically distinct and thereby differ in their affinity for iron (45). Strategies to  
279 utilize siderophores as a shared resource are also numerous, leading to different cooperative or  
280 competitive outcomes in microbial communities (45, 46). One must consider that additional mechanisms  
281 for acquiring  $\text{NH}_4^+$  beyond AmtB might likewise exist. As our results have raised the potential for inter-  
282 partner competition for cross-fed resources themselves, understanding the physiological mechanisms that  
283 confer competitive advantages between species will undoubtedly aid in describing the interplay between  
284 competition and cooperation within mutualisms.

285

## 286 **Materials and Methods**

287 **Strains and growth conditions.** Strains, plasmids, and primers are listed in Supplementary Table 2. All  
288 *R. palustris* strains contained *ΔuppE* and *ΔhupS* mutations to facilitate accurate colony forming unit  
289 (CFU) measurements by preventing cell aggregation (49) and to prevent  $\text{H}_2$  uptake, respectively. *E. coli*  
290 was cultivated on Luria-Burtani (LB) agar and *R. palustris* on defined mineral (PM) (50) agar with 10  
291 mM succinate.  $(\text{NH}_4)_2\text{SO}_4$  was omitted from PM agar for determining *R. palustris* CFUs. Monocultures  
292 and cocultures were grown in 10-mL of defined M9-derived coculture medium (MDC) (26) in 27-mL  
293 anaerobic test tubes. To make the medium anaerobic, MDC was bubbled with  $\text{N}_2$ , and tubes were sealed

294 with rubber stoppers and aluminum crimps, and then autoclaved. After autoclaving, MDC was  
295 supplemented with cation solution (1 % v/v; 100 mM MgSO<sub>4</sub> and 10 mM CaCl<sub>2</sub>) and glucose (25 mM),  
296 unless indicated otherwise. *E. coli* monocultures were also supplemented with 15mM NH<sub>4</sub>Cl. All cultures  
297 were grown at 30°C laying horizontally under a 60 W incandescent bulb with shaking at 150 rpm. Starter  
298 cocultures were inoculated with 200 µL MDC containing a suspension of a single colony of each species.  
299 Test cocultures were inoculated using a 1% inoculum from starter cocultures. Serial transfers were also  
300 inoculated with a 1% inoculum. Kanamycin and gentamycin were added to a final concentration of 100  
301 µg/ml for *R. palustris* and 15 µg/ml for *E. coli* where appropriate.

302 **Generation of *R. palustris* mutants.** *R. palustris* mutants were derived from wild-type CGA009 (51).  
303 Generation of strains CGA4004, CGA4005, and CGA4021 was described previously (26). For generation  
304 of strain CGA4026 (*R. palustris* ΔAmtB) the WT *nifA* gene was amplified using primers JBM1 and  
305 JBM2, digested with XbaI and BamHI, and ligated into plasmid pJQ200SK to make pJQnifA16. This  
306 suicide vector was then introduced into CGA4021 by conjugation, and sequential selection and screening  
307 was performed as described (52) to replace *nifA*\* with WT *nifA*. Reintroduction of the WT *nifA* gene was  
308 confirmed by PCR and sequencing.

309 **Generation of the *E. coli* ΔAmtB mutant.** P1 transduction (53) was used to introduce Δ*amtB*::*Km* from  
310 the Keio collection strain JW0441-1 (54) into MG1655. The Δ*amtB*::*Km* genotype of kanamycin-resistant  
311 colonies was confirmed by PCR and sequencing.

312 **Analytical procedures.** Cell density was assayed by optical density at 660 nm (OD<sub>660</sub>) using a Genesys  
313 20 visible spectrophotometer (Thermo-Fisher, Waltham, MA, USA). Growth curve readings were taken  
314 in culture tubes without sampling (i.e., Tube OD<sub>660</sub>). Specific growth rates were determined using  
315 measurements between 0.1-1.0 OD<sub>660</sub> where there is linear correlation between cell density and OD<sub>660</sub>.  
316 Final OD<sub>660</sub> measurements were taken in cuvettes and samples were diluted into the linear range as  
317 necessary. H<sub>2</sub> was quantified using a Shimadzu (Kyoto, Japan) gas chromatograph (GC) with a thermal  
318 conductivity detector as described (55). Glucose, organic acids, formate and ethanol were quantified using

319 a Shimadzu high-performance liquid chromatograph (HPLC) as described (56).  $\text{NH}_4^+$  was quantified  
320 using an indophenol colorimetric assay as described (26).

321 **Nitrogenase activity.** Nitrogenase activity was measured using an acetylene reduction assay (43). Cells  
322 from 10-mL cultures were harvested and resuspended in 10-mL fresh MDC medium in 27-mL sealed  
323 tubes pre-flushed with argon gas. Suspensions were incubated in light for 1 hour at 30°C to recover.  
324 Then, 250  $\mu\text{l}$  of 100% acetylene gas was injected into the headspace to initiate the assay, and ethylene  
325 production was measured over time by gas chromatography as described (43). Ethylene levels were  
326 normalized to total *R. palustris* CFUs in the 10-ml volume.

327  **$\text{NH}_4^+$  competition assay.** Fed-batch cultures were performed in custom anaerobic serum vials with side  
328 sampling ports. Each vial contained a stir bar and 30-mL of sterile, anaerobic MDC medium, and was  
329 sealed at both ends with rubber stoppers and aluminum crimps. Each vial was supplemented with 25 mM  
330 glucose, 1 % v/v cation solution and 20 mM sodium acetate. Starter monocultures of each species were  
331 grown to equivalent CFUs/mL in MDC tubes containing limiting nutrients (3 mM sodium acetate for *R.*  
332 *palustris* and 1.5 mM  $\text{NH}_4\text{Cl}$  for *E. coli*), and 1 mL of each species was inoculated into the serum vials.  
333 These competition cocultures were incubated at 30°C under a 60 W incandescent bulb with constant  
334 stirring at 200 rpm on a Variomag magnetic stirrer (Thermo Scientific) for 96 hours.  $\text{NH}_4\text{Cl}$  was fed to  
335 cultures from a 500  $\mu\text{M}$   $\text{NH}_4\text{Cl}$  stock using a peristaltic pump (Watson-Marlow) on an automatic timer  
336 (Intermatic DT620) at a rate of 0.33-mL/minute once an hour for 96 hours for a final concentration of ~  
337 0.5  $\mu\text{M}$  upon each addition. Each serum vial was constantly flushed with Ar gas to maintain anaerobic  
338 conditions. Samples were taken at 0 and 96 h for quantification of CFUs.

339 **Mathematical modeling.** A Monod model describing bi-directional cross-feeding in batch cultures,  
340 called SyFFoN\_v3 (Syntrophy between Fermenter and Fixer of Nitrogen), was modified from our  
341 previous model (33) to allow for competition between *E. coli* and *R. palustris* for  $\text{NH}_4^+$  as follows: (i) an  
342 equation for *R. palustris* growth rate on  $\text{NH}_4^+$  was added to boost the *R. palustris* growth rate when  
343 acquiring  $\text{NH}_4^+$  and (ii) the  $K_m$  of *R. palustris* for  $\text{NH}_4^+$  ( $K_{AR}$ ) was included. Equations and default

344 parameter values are in Supplementary Table 1. SyFFoN\_v3 runs in R studio and is available for  
345 download at: <https://github.com/McKinlab/Coculture-Mutualism>.

346

### 347 **Acknowledgments**

348 We thank Richard Phillips (Indiana University) for providing equipment for the NH<sub>4</sub><sup>+</sup> competition assay.

349 We also thank Jay Lennon (Indiana University) for helpful discussions on the manuscript. This work was

350 supported in part by the U.S. Department of Energy, Office of Science, Office of Biological and

351 Environmental Research, under Award Number DE-SC0008131, by the U.S. Army Research Office,

352 grant W911NF-14-1-0411, and by the Indiana University College of Arts and Sciences.

353

### 354 **References**

355 1. Flint HJ, Duncan SH, Scott KP, Louis P (2007) Interactions and competition within the microbial  
356 community of the human colon: Links between diet and health: Minireview. *Environ Microbiol*  
357 9(5):1101–1111.

358 2. Hammer ND, et al. (2014) Inter- and intraspecies metabolite exchange promotes virulence of  
359 antibiotic-resistant *Staphylococcus aureus*. *Cell Host Microbe* 16(4):531–537.

360 3. McNerney MJ, Sieber JR, Gunsalus RP (2010) Syntrophy in anaerobic global carbon cycles. *Curr*  
361 *Opin Biotechnol* 20(6):623–632.

362 4. Durham BP, et al. (2015) Cryptic carbon and sulfur cycling between surface ocean plankton. *Proc*  
363 *Natl Acad Sci* 112(2):453–457.

364 5. Reeburgh WS (2007) Oceanic methane biogeochemistry. *Chem Rev* 107:486–513.

365 6. Croft MT, Lawrence AD, Raux-Deery E, Warren MJ, Smith AG (2005) Algae acquire vitamin B12  
366 through a symbiotic relationship with bacteria. *Nature* 438(7064):90–93.

367 7. McNerney MJ, et al. (2008) Physiology, ecology, phylogeny, and genomics of microorganisms  
368 capable of syntrophic metabolism. *Ann N Y Acad Sci* 1125:58–72.



- 369 8. Hillesland KL, Stahl D a (2010) Rapid evolution of stability and productivity at the origin of a  
370 microbial mutualism. *Proc Natl Acad Sci U S A* 107(5):2124–2129.
- 371 9. Schink B (1997) Energetics of syntrophic cooperation in methanogenic degradation. *Microbiol Mol*  
372 *Biol Rev* 61(2):262–280.
- 373 10. Stams AJM (1994) Metabolic interactions between anaerobic bacteria in methanogenic environments.  
374 *Antonie van Leeuwenhoek*, 66(1–3):271–294.
- 375 11. Grant MA, Kazamia E, Cicuta P, Smith AG (2014) Direct exchange of vitamin B12 is demonstrated  
376 by modelling the growth dynamics of algal-bacterial cocultures. *ISME J* 8(7):1–10.
- 377 12. Seth EC, Taga ME (2014) Nutrient cross-feeding in the microbial world. *Front Microbiol* 5(July):350.
- 378 13. Behrens S, et al. (2008) Linking microbial phylogeny to metabolic activity at the single-cell level by  
379 using enhanced element labeling-catalyzed reporter deposition fluorescence in situ hybridization (EL-  
380 FISH) and NanoSIMS. *Appl Environ Microbiol* 74(10):3143–3150.
- 381 14. Adam B, et al. (2015) N<sub>2</sub>-fixation, ammonium release and N-transfer to the microbial and classical  
382 food web within a plankton community. *ISME J*:1–10.
- 383 15. Estrela S, Morris JJ, Kerr B (2016) Private benefits and metabolic conflicts shape the emergence of  
384 microbial interdependencies. *Environ Microbiol* 18(5):1415–1427.
- 385 16. Meyer JS, Tsuchiya HM (1975) Dynamics of mixed populations having complementary metabolism.  
386 *Biotechnol Bioeng* 17:1065–1081.
- 387 17. Kim HJ, Boedicker JQ, Choi JW, Ismagilov RF (2008) Defined spatial structure stabilizes a synthetic  
388 multispecies bacterial community. *Proc Natl Acad Sci U S A* 105(47):18188–18193.
- 389 18. Miura Y, Tanaka H, Okazaki M (1980) Stability analysis of commensal and mutual relations with  
390 competitive assimilation in continuous mixed culture. *Biotechnol Bioeng* 22(5):929–946.
- 391 19. Estrela S, Trisos CH, Brown SP (2012) From metabolism to ecology: cross-feeding interactions shape  
392 the balance between polymicrobial conflict and mutualism. *Am Nat* 180(5):566–576.



- 393 20. Bulen WA, LeCompte JR (1966) The nitrogenase system from *Azotobacter*: two-enzyme requirement  
394 for N<sub>2</sub> reduction, ATP-dependent H<sub>2</sub> evolution, and ATP hydrolysis. Proc Natl Acad Sci U S A  
395 56(3):979–986.
- 396 21. Walter A, Gutknecht J (1986) Permeability of small nonelectrolytes through lipid bilayer membranes.  
397 J Membr Biol 90(3):207–217.
- 398 22. Kim M, et al. (2012) Need-based activation of ammonium uptake in *Escherichia coli*. Mol Syst Biol  
399 8(616):1–10.
- 400 23. Peng J, Huang CH (2006) Rh proteins vs Amt proteins: an organismal and phylogenetic perspective  
401 on CO<sub>2</sub> and NH<sub>3</sub> gas channels. Transfus Clin Biol 13(1–2):85–94.
- 402 24. Barney BM, Eberhart LJ, Ohlert JM, Knutson CM, Plunkett MH (2015) Gene deletions resulting in  
403 increased nitrogen release by *Azotobacter vinelandii*: Application of a novel nitrogen biosensor. Appl  
404 Environ Microbiol 81(13):4316–4328.
- 405 25. Zhang T, et al. (2012) Involvement of the ammonium transporter AmtB in nitrogenase regulation and  
406 ammonium excretion in *Pseudomonas stutzeri* A1501. Res Microbiol 163(5):332–339.
- 407 26. LaSarre B, McCully AL, Lennon JT, McKinlay JB (2017) Microbial mutualism dynamics governed  
408 by dose-dependent toxicity of cross-fed nutrients. ISME J 11:337–348.
- 409 27. Widder S, et al. (2016) Challenges in microbial ecology: building predictive understanding of  
410 community function and dynamics. ISME J 10:2557–2568.
- 411 28. Momeni B, Chen CC, Hillesland KL, Waite A, Shou W (2011) Using artificial systems to explore the  
412 ecology and evolution of symbioses. Cell Mol Life Sci 68(8):1353–1368.
- 413 29. Lindemann SR, et al. (2016) Engineering microbial consortia for controllable outputs. ISME J  
414 10:2077–2084.
- 415 30. McKinlay JB, Harwood CS (2010) Carbon dioxide fixation as a central redox cofactor recycling  
416 mechanism in bacteria. Proc Natl Acad Sci U S A 107(26):11669–11675.
- 417 31. Rey FE, Heiniger EK, Harwood CS (2007) Redirection of metabolism for biological hydrogen  
418 production. Appl Environ Microbiol 73(5):1665–1671.

- 419 32. Heiniger EK, Oda Y, Samanta SK, Harwood CS (2012) How posttranslational modification of  
420 nitrogenase is circumvented in *Rhodopseudomonas palustris* strains that produce hydrogen gas  
421 constitutively. *Appl Environ Microbiol* 78(4):1023–1032.
- 422 33. McCully AL, LaSarre B, McKinlay JB Growth-independent cross-feeding modifies boundaries for  
423 coexistence in a bacterial mutualism. <http://biorxiv.org/content/early/2016/10/25/083386>
- 424 34. Yakunin AF, Hallenbeck PC (2002) AmtB is necessary for  $\text{NH}_4^+$ -induced nitrogenase switch-off and  
425 ADP-ribosylation in *Rhodobacter capsulatus*. 184(15):4081–4088.
- 426 35. Hoffman BM, Lukoyanov D, Dean DR, Seefeldt LC (2013) Nitrogenase: A draft mechanism. *Acc*  
427 *Chem Res* 46(2):587–595.
- 428 36. Rankin DJ, Bargum K, Kokko H (2007) The tragedy of the commons in evolutionary biology. *Trends*  
429 *Ecol Evol* 22(12):643–651.
- 430 37. Pande S, et al. (2014) Fitness and stability of obligate cross-feeding interactions that emerge upon  
431 gene loss in bacteria. *ISME J* 8(5):953–962.
- 432 38. Harcombe W (2010) Novel cooperation experimentally evolved between species. *Evolution*  
433 64(7):2166–2172.
- 434 39. Bronstein JL (2001) The exploitation of mutualisms. *Ecol Lett* 4:277–287.
- 435 40. Isack HA, Reyer H-U (1989) Honeyguides and honey gatherers: Interspecific communication in a  
436 symbiotic relationship. *Science* 243(4896):1343–1346.
- 437 41. Bshary R, Hohner A, Ait-el-Djoudi K, Fricke H (2006) Interspecific communicative and coordinated  
438 hunting between groupers and giant moray eels in the red sea. *PLoS Biol* 4(12):2393–2398.
- 439 42. Sachs JL, Mueller UG, Wilcox TP, Bull JJ (2004) The evolution of cooperation. *Q Rev Biol*  
440 51(2):211–244.
- 441 43. Oda Y, et al. (2005) Functional genomic analysis of three nitrogenase isozymes in the photosynthetic  
442 bacterium *Rhodopseudomonas palustris*. *J Bacteriol* 187(22):7784–7794.
- 443 44. Morris JJ, Lenski RE, Zinser ER (2012) The black queen hypothesis: Evolution of dependencies  
444 through adaptive gene loss. *mBio* 3(2):1–7.

- 445 45. Joshi F, Archana G, Desai A (2006) Siderophore cross-utilization amongst rhizospheric bacteria and  
446 the role of their differential affinities for Fe<sup>3+</sup> on growth stimulation under iron-limited conditions.  
447 Curr Microbiol 53(2):141–147.
- 448 46. Niehus R, Picot A, Oliveira NM, Mitri S, Foster KR (2017) The evolution of siderophore production  
449 as a competitive trait. Evolution (N Y). doi:10.1111/evo.13230.
- 450 47. Pande S, Kost C (2017) Bacterial unculturability and the formation of intercellular metabolic  
451 networks. Trends Microbiol xx:1–13.
- 452 48. Blagodatskaya E, Littschwager J, Lauerer M, Kuzyakov Y (2014) Plant traits regulating N capture  
453 define microbial competition in the rhizosphere. Eur J Soil Biol 61:41–48.
- 454 49. Fritts RK, Lasarre B, Stoner AM, Posto AL, McKinlay JB (2017) A *Rhizobiales*-specific unipolar  
455 polysaccharide adhesin contributes to *Rhodopseudomonas palustris* biofilm formation across diverse  
456 photoheterotrophic conditions. 83(4):1–14.
- 457 50. Kim M-K, Harwood CS (1991) Regulation of benzoate-CoA ligase in *Rhodopseudomonas palustris*.  
458 FEMS Microbiol Lett 83:199–203.
- 459 51. Larimer FW, et al. (2004) Complete genome sequence of the metabolically versatile photosynthetic  
460 bacterium *Rhodopseudomonas palustris*. Nat Biotechnol 22(1):55–61.
- 461 52. Rey FE, Oda Y, Harwood CS (2006) Regulation of uptake hydrogenase and effects of hydrogen  
462 utilization on gene expression in *Rhodopseudomonas palustris*. J Bacteriol 188(17):6143–6152.
- 463 53. Thomason LC, Costantino N, Court DL (2007) *E. coli* genome manipulation by P1 transduction. Curr  
464 Protoc Mol Biol doi: 10.1002/0471142727.mb0117s79.
- 465 54. Baba T, et al. (2006) Construction of *Escherichia coli* K-12 in-frame, single-gene knockout mutants:  
466 the Keio collection. Mol Syst Biol 2:2006.0008.
- 467 55. Huang JJ, Heiniger EK, McKinlay JB, Harwood CS (2010) Production of hydrogen gas from light  
468 and the inorganic electron donor thiosulfate by *Rhodopseudomonas palustris*. Appl Environ  
469 Microbiol 76(23):7717–7722.

- 470 56. McKinlay JB, Zeikus JG, Vieille C (2005) Insights into *Actinobacillus succinogenes* fermentative  
471 metabolism in a chemically defined growth medium. Appl Env Microbiol 71(11):6651–6656.
- 472 57. Buhr A, Daniels GA, Erni B (1992) The glucose transporter of *Escherichia coli*: Mutants with  
473 impaired translocation activity that retain phosphorylation activity. J Biol Chem 267(6):3847–3851.
- 474 58. Khademi S, et al. (2004) Mechanism of ammonia transport by Amt/MEP/Rh: structure of AmtB at  
475 1.35 Å. Science 305(5690):1587–1594.
- 476 59. Hayashi K, et al. (2006) Highly accurate genome sequences of *Escherichia coli* K-12 strains MG1655  
477 and W3110. Mol Syst Biol 2(1):2006.0007.

478

479 **Figures**

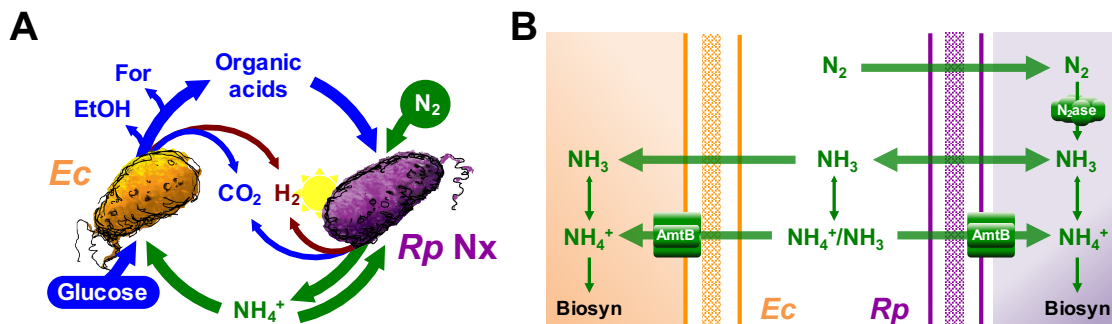

480

- 481 **Fig. 1. Mechanisms of NH<sub>4</sub><sup>+</sup> transfer within an obligate bacterial mutualism based on cross-feeding**  
482 **of essential nutrients.** (A) *Escherichia coli* (*Ec*) anaerobically ferments glucose into organic acids,  
483 supplying *Rhodopseudomonas palustris* Nx (*Rp Nx*) with essential carbon. *R. palustris* Nx fixes N<sub>2</sub> gas  
484 and excretes NH<sub>4</sub><sup>+</sup>, supplying *E. coli* with essential nitrogen. For, formate EtOH, ethanol. (B) NH<sub>4</sub><sup>+</sup> can be  
485 passively lost from cells as NH<sub>3</sub>. Both species encode high-affinity NH<sub>4</sub><sup>+</sup> transporters, AmtB, that  
486 facilitate NH<sub>4</sub><sup>+</sup> uptake. NH<sub>4</sub><sup>+</sup> is the predominant form at neutral pH, as indicated by enlarged arrow head  
487 on double-sided arrows.

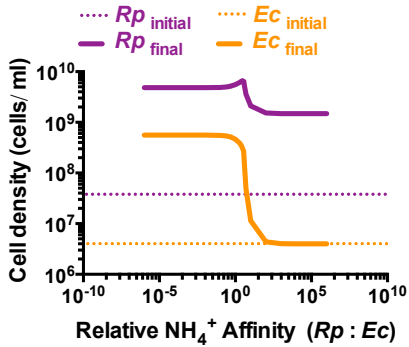

488

489 **Fig. 2. Simulations suggest that *E. coli* must have a competitive advantage for  $\text{NH}_4^+$  acquisition**  
 490 **relative to *R. palustris* to support mutualistic growth.** Final cell densities (solid lines) of *R. palustris*  
 491 (*Rp*, purple) and *E. coli* (*Ec*, orange) after 300 h in simulated batch cultures for a range of relative  $\text{NH}_4^+$   
 492 affinities. Initial cell densities are indicated by dotted lines. Relative  $\text{NH}_4^+$  affinity values represent the  
 493 relative *E. coli*  $K_M$  for  $\text{NH}_4^+$  ( $K_A$ ) compared to that of *R. palustris* ( $K_{AR}$ ).

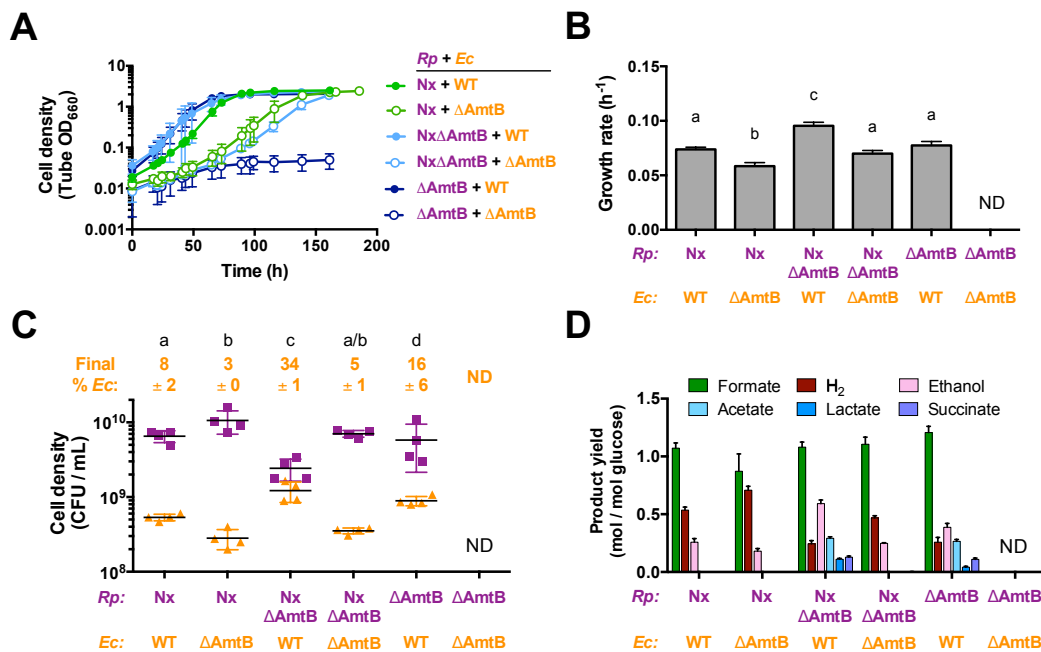

494

495 **Fig. 3.  $\text{NH}_4^+$  transporters influence population and metabolic trends of both partners in coculture.**  
 496 Growth curves (A), growth rates (B), final cell densities after one culturing (C), and fermentation product  
 497 yields (D) from cocultures of all combinations of mutants lacking AmtB in each species. Final cell  
 498 densities and fermentation product yields were taken after one week, within 24 hours into stationary

499 phase. ND, not determined. Error bars indicate SD, n=4. Different letters indicate statistical differences, p  
 500 < 0.05, determined by one-way ANOVA with Tukey's multiple comparisons post test.  
 501

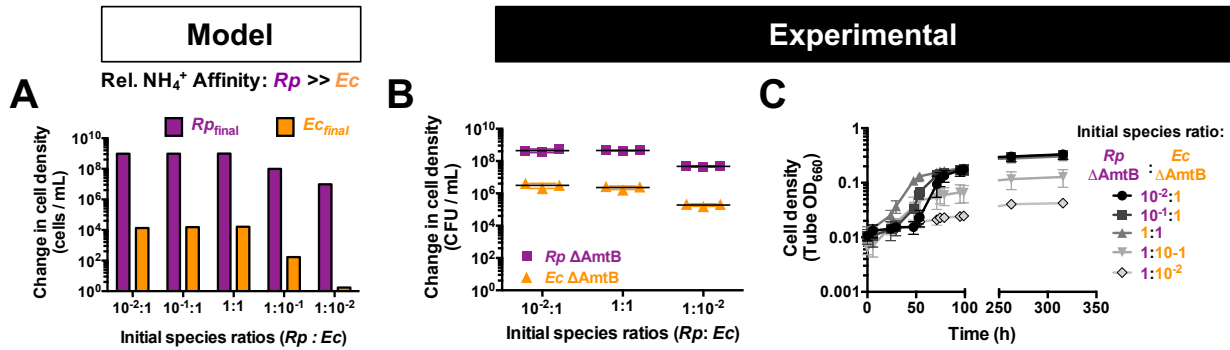

502  
 503 **Fig. 4. Higher initial cell densities of *E. coli*  $\Delta AmtB$  can partially compensate for a low *E. coli*  $\text{NH}_4^+$**   
 504 **affinity.** Simulations (A) and empirical data (B,C) showing the effect of initial *E. coli* (*Ec*) cell density on  
 505 population and coculture growth trends when *E. coli* has a lower affinity for  $\text{NH}_4^+$  compared to *R.*  
 506 *palustris* (*Rp*). (A) 300 h batch cultures were simulated with a relative *R. palustris* : *E. coli* ( $Rp : Ec$ )  $K_M$   
 507 value for  $\text{NH}_4^+$  of 0.001. (B, C) Change in cell densities after one week of growth (B) and growth curves  
 508 (C) of cocultures inoculated at different species ratios. (A-C) A ratio value of 1 represents  $2.7 \times 10^6$   
 509 CFUs/mL, which was experimentally measured from the starting inoculum for both species before  
 510 diluting to achieve the indicated ratios. Error bars indicate SD, n=3.

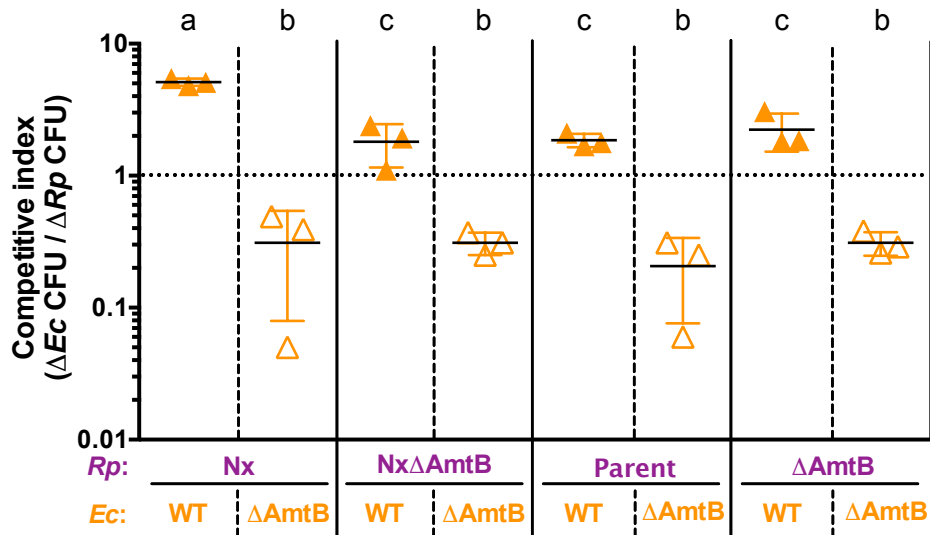

511

512 **Fig. 5. AmtB is important for competitive NH<sub>4</sub><sup>+</sup> acquisition.** Competitive indices for *E. coli* after 96  
513 hours in NH<sub>4</sub><sup>+</sup>-limited competition assay cocultures. Cocultures were inoculated with *E. coli* and *R.*  
514 *palustris* at equivalent cell densities with excess carbon available for both species (25 mM glucose for *E.*  
515 *coli* and 20 mM sodium acetate for *R. palustris*). NH<sub>4</sub><sup>+</sup> was added to cocultures to a final concentration of  
516 0.5 μM every hour for 96 hours. The dotted line indicates a competitive index value of 1, where both  
517 species are equally competitive for NH<sub>4</sub><sup>+</sup>. Filled triangles, WT *E. coli*; open triangles *E. coli* ΔAmtB.  
518 Error bars indicate SD, n=3. Different letters indicate statistical differences between *E. coli* competitive  
519 index values, p < 0.05, determined by one-way ANOVA with Tukey's multiple comparisons post test.

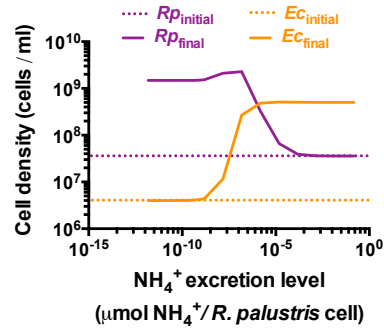

520

521 **Fig. 6. Higher *R. palustris*  $\text{NH}_4^+$  excretion levels are predicted to compensate for a low *E. coli*  $\text{NH}_4^+$**   
 522 **affinity.** 300 h batch cultures were simulated with a relative *R. palustris* : *E. coli* (*Ec* : *Rp*)  $K_M$  value for  
 523  $\text{NH}_4^+$  of 0.001 over different *R. palustris*  $\text{NH}_4^+$  excretion levels ( $R_A$ ). Final cell densities, solid lines;  
 524 initial cell densities, dotted lines.

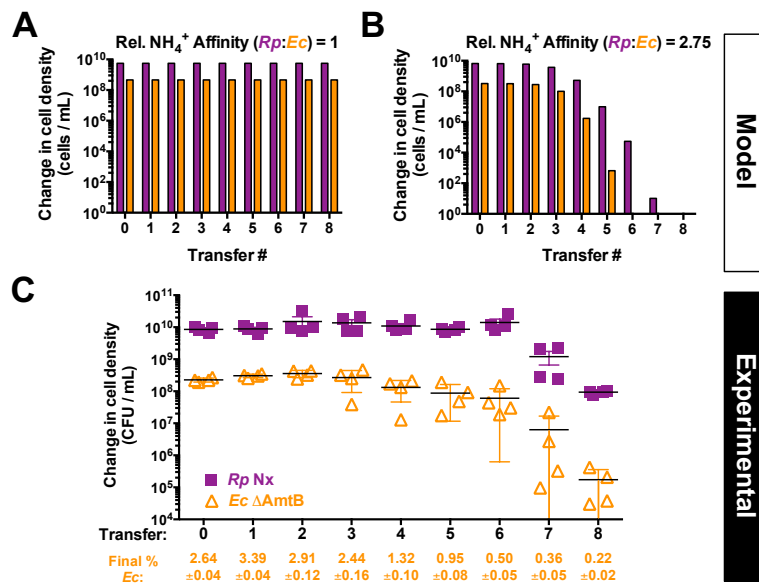

525

526 **Fig. 7. A low *E. coli*  $\text{NH}_4^+$  affinity results in coculture collapse over serial transfers when paired**  
 527 **with *R. palustris* Nx.** (A,B) 300 h batch cultures were simulated and serial transferred used a 1%  
 528 inoculum based on the cell density at 300 h for the previous culture. Relative  $\text{NH}_4^+$  affinity values  
 529 represent the relative *E. coli*  $K_M$  for  $\text{NH}_4^+$  ( $K_A$ ) compared to that of *R. palustris* ( $K_{AR}$ ). (C) Final cell  
 530 densities of *R. palustris* Nx and *E. coli*  $\Delta\text{AmtB}$  of cocultures grown for one week, less than 24 hours into  
 531 stationary phase. A 1% inoculum was used for each subsequent serial transfer. Error bars indicate SD,  
 532  $n=4$ . Final *E. coli* cell percentages  $\pm$  SD for each transfer are shown.



533 **Recipient-biased competition for a cross-fed nutrient is required**

534 **for coexistence of microbial mutualists**

535 Alexandra L. McCully, Breah LaSarre, James B. McKinlay<sup>#</sup>

536 **Supplementary Materials.**

537

538 **SyFFoN\_v3 description.**

539 Equations 1 – 4 were used to describe *E. coli* and *R. palustris* growth rates:

540

541 Eq. 1: *E. coli* growth rate;  $\mu_{Ec} = \mu_{EcMAX} \cdot [G/(K_G+G)] \cdot [A/(K_A+A)] \cdot [b_{Ec}/(b_{Ec}+10^{(f+C)})]$

542

543 Eq. 2: *R. palustris* growth rate ( $N_2$ );  $\mu_{RpN} = \mu_{RpMAX} \cdot [C/(K_C+C)] \cdot [N/(K_N+N)] \cdot [b_{Rp}/(b_{Rp}+10^{(f+C)})]$

544

545 Eq. 3: *R. palustris* growth rate ( $NH_4^+$ );  $\mu_{Rpa} =$   
 546  $\mu_{RpMAX2} \cdot [C/(K_C+C)] \cdot [A/(K_{AR}+A)] \cdot [b_{Rp}/(b_{Rp}+10^{(f+C)})]$

547

548 Eq 4: Total *R. palustris* growth rate;  $\mu_{Rp} = \mu_{RpN} + \mu_{Rpa}$

549

550 Equations 5-14 were used to describe temporal changes in cell densities and extracellular  
 551 compounds. Numerical constants in product excretion equations are used to account for molar  
 552 stoichiometric conversions. Numerical constants used in sigmoidal functions are based on those  
 553 values that resulted in simulations resembling empirical trends. All R and r parameters are  
 554 expressed in terms of glucose consumed except for  $R_A$ , which is the amount of  $NH_4^+$  produced  
 555 per *R. palustris* cell (Supplementary Table 1).

556

557 Eq. 5: Glucose;  $dG/dt = -\mu_{Ec} \cdot Ec/Y_G - \mu_{Ec} \cdot Ec \cdot (R_c + R_f + R_e + R_{CO2}) -$   
 558  $Ec \cdot (G/(K_G+G)) \cdot (10/(10+1.09^{(1000 \cdot \mu_{Ec})})) \cdot (b_{Ec}/(b_{Ec}+10^{(f+C)})) \cdot ((100/(100+6^C)) \cdot$   
 559  $(r_C + r_f + r_e + r_{CO2}) + r_{C\_mono} + r_{f\_mono} + r_{e\_mono} + r_{CO2\_mono})$

560

561 Eq. 6:  $N_2$ ;  $dN/dt = -\mu_{Rp} \cdot Rp \cdot 0.5 \cdot Ra \cdot (1 - (40/(40+1.29^N))) - \mu_{Rp} \cdot Rp/Y_N$

562

563 Eq. 7: Consumable organic acids;  $dC/dt = Ec \cdot \mu_{Ec} \cdot R_c \cdot 2 + Ec \cdot 2 \cdot (G/(K_G+G))$   
 564  $\cdot (10/(10+1.09^{(1000 \cdot \mu_{Ec})})) \cdot (b_{Ec}/(b_{Ec}+10^{(f+C)})) \cdot (r_C \cdot (100/(100+6^C)) + r_{C\_mono}) - (\mu_{Rp} \cdot Rp/Y_C)$   
 565  $- 0.25 \cdot Rp \cdot \mu_{Rp} \cdot Rh_{Rp} - 0.25 \cdot Rp \cdot r_{Hp} \cdot (C/(K_C+C)) \cdot (40/(40+1.29^N)) \cdot (b_{Rp}/(b_{Rp}+10^{(f+C)}))$

566

567 Eq. 8: Formate;  $df/dt = (Ec \cdot \mu_{Ec} \cdot R_f \cdot 6) + Ec \cdot 6 \cdot (G/(K_G+G)) \cdot (10/(10+1.09^{(1000 \cdot \mu_{Ec})}))$   
 568  $\cdot (b_{Ec}/(b_{Ec}+10^{(f+C)})) \cdot (r_f \cdot (100/(100+6^C)) + r_{f\_mono})$

569

570 Eq. 9:  $NH_4^+$ ;  $dA/dt = Rp \cdot \mu_{Rp} \cdot R_A \cdot (1 - (40/(40+1.29^N))) - \mu_{Ec} \cdot Ec/Y_A - (\mu_{Rp} \cdot Rp/Y_{AR}) \cdot (A/(K_{AR}+A))$

571

572 Eq. 10: *E. coli*;  $dEc/dt = \mu_{Ec} \cdot Ec$

573

574 Eq. 11: *R. palustris*;  $dRp/dt = \mu_{Rp} \cdot Rp$

575

576 Eq. 12: Ethanol;  $de/dt = Ec \cdot 3 \cdot (\mu_{Ec} \cdot R_e + (G/(K_G+G)) \cdot (10/(10+1.09^{(1000 \cdot \mu_{Ec})}))$   
577  $\cdot (b_{Ec}/(b_{Ec}+10^{(f+C)})) \cdot (r_e \cdot (100/(100+6^C)) + r_{e\_mono})$

578

579 Eq. 13: CO<sub>2</sub>;  $dCO_2/dt = Ec \cdot 6 \cdot (\mu_{Ec} \cdot R_{CO_2} + (G/(K_G+G)) \cdot (10/(10+1.09^{(1000 \cdot \mu_{Ec})}))$   
580  $\cdot (b_{Ec}/(b_{Ec}+10^{(f+C)})) \cdot (r_{CO_2} \cdot (100/(100+6^C)) + r_{CO_2\_mono})$

581  $+ Rp \cdot 0.5 \cdot (\mu_{Rp} \cdot R_{hRp} + r_{Hp} \cdot (C/(K_C+C)) \cdot (40/(40+1.29^N))) \cdot (b_{Rp}/(b_{Rp}+10^{(f+C)}))$

582 Eq. 14: H<sub>2</sub>;  $dH/dt = Rp \cdot (\mu_{Rp} \cdot R_{HRp} + r_{Hp} \cdot (C/(K_C+C)) \cdot (40/(40+1.29^N))) \cdot$   
583  $(b_{Rp}/(b_{Rp}+10^{(f+C)})) + Ec \cdot (\mu_{Ec} \cdot R_{HEc} + (G/(K_G+G)) \cdot (10/(10+1.09^{(1000 \cdot \mu_{Ec})})) \cdot$   
584  $(b_{Ec}/(b_{Ec}+10^{(f+C)})) \cdot (r_H \cdot (100/(100+6^C)) + r_{H\_mono})$

585

586 Where,

587  $\mu$  is the specific growth rate of the indicated species (h<sup>-1</sup>).

588

589  $\mu_{MAX}$  is the maximum specific growth rate of the indicated species (h<sup>-1</sup>).

590

591 G, A, C, N, f, e, H and CO<sub>2</sub> are the concentrations (mM) of glucose, NH<sub>4</sub><sup>+</sup>, consumable organic  
592 acids, N<sub>2</sub>, formate, ethanol, H<sub>2</sub>, and CO<sub>2</sub>, respectively. All gasses are assumed to be fully  
593 dissolved. Consumable organic acids are those that *R. palustris* can consume, namely, lactate (3  
594 carbons), acetate (2 carbons), and succinate (4 carbons). All consumable organic acids were  
595 simulated to have three carbons for convenience. Only net accumulation of formate, ethanol,  
596 CO<sub>2</sub> and H<sub>2</sub> are described in accordance with observed trends.

597

598 K is the half saturation constant for the indicated substrate (mM).

599

600 Ec and Rp are the cell densities (cells/ml) of *E. coli* and *R. palustris*, respectively.

601

602 b is the ability of a species to resist the inhibiting effects of acid (mM).

603

604 Y is the *E. coli* or *R. palustris* cell yield from the indicated substrate (cells /  $\mu$ mol glucose). Y  
605 values were determined in MDC with the indicated substrate as the limiting nutrient.

606

607 R is the fraction of glucose converted into the indicated compound per *E. coli* cell during growth  
608 ( $\mu$ mol of glucose / *E. coli* cell), except for R<sub>A</sub>. Values were adjusted to accurately simulate  
609 product yields measured in cocultures and in MDC with and without added NH<sub>4</sub>Cl.

610

611 R<sub>A</sub> is the ratio of NH<sub>4</sub><sup>+</sup> produced per *R. palustris* cell during growth ( $\mu$ mol / *R. palustris* cell).  
612 The default value was based on that which accurately simulated empirical trends.

613 r is the growth-independent rate of glucose converted into the indicated compound ( $\mu$ mol / cell /  
614 h). Default values are based on those which accurately simulated empirical trends in coculture.

615

616 r<sub>mono</sub> is the growth-independent rate of glucose converted into the indicated compound by *E. coli*  
617 when consumable organic acids accumulate. Default values are based on linear regression of  
618 products accumulated over time in nitrogen-free cell suspensions of *E. coli* (26).

619 **Supplementary Table 1. Default parameter values used in the model unless stated otherwise**  
 620

| Parameter      | Value                  | Description (Units); Source                                                                                                                                                      |
|----------------|------------------------|----------------------------------------------------------------------------------------------------------------------------------------------------------------------------------|
| $\mu_{EcMAX}$  | 0.2800                 | <i>E. coli</i> max growth rate ( $h^{-1}$ ); Monoculture                                                                                                                         |
| $\mu_{RpMAX}$  | 0.0772                 | <i>R. palustris</i> max growth rate ( $h^{-1}$ ); Monoculture                                                                                                                    |
| $\mu_{RpMAX2}$ | 0.0152                 | Boost on <i>R. palustris</i> growth rate in presence of $NH_4^+$ ( $h^{-1}$ ); Monoculture <sup>a</sup>                                                                          |
| G              | 25                     | Glucose (mM)                                                                                                                                                                     |
| A              | 0.00005                | $NH_4^+$ (mM); from initial $(NH_4)_6Mo_7O_{24} \cdot 4H_2O$ concentration                                                                                                       |
| C              | 0                      | Consumable organic acids (those that <i>R. palustris</i> was observed to consume: lactate, acetate, and succinate; mM)                                                           |
| N              | 70                     | $N_2$ (assumed to be fully dissolved; mM)                                                                                                                                        |
| f              | 0                      | Formate (mM)                                                                                                                                                                     |
| e              | 0                      | Ethanol (mM)                                                                                                                                                                     |
| CO2            | 0                      | Carbon dioxide (mM)                                                                                                                                                              |
| $K_G$          | 0.02                   | <i>E. coli</i> affinity (Michaelis-Menten constant ( $K_M$ )) for glucose (mM); (57)                                                                                             |
| $K_C$          | 0.01                   | <i>R. palustris</i> affinity ( $K_M$ ) for consumable organic acids (mM); Assumed                                                                                                |
| $K_A$          | 0.01                   | <i>E. coli</i> affinity for $NH_4^+$ (mM); (58)                                                                                                                                  |
| $K_{AR}$       | 0.01                   | <i>R. palustris</i> affinity for $NH_4^+$ (mM); Assumed <sup>b</sup>                                                                                                             |
| $K_N$          | 6                      | <i>R. palustris</i> affinity ( $K_M$ ) for $N_2$ (mM)                                                                                                                            |
| Ec             | $0.4 \times 10^7$      | <i>E. coli</i> cell density (cells / ml)                                                                                                                                         |
| Rp             | $3.6 \times 10^7$      | <i>R. palustris</i> cell density (cells / ml)                                                                                                                                    |
| $b_{Ec}$       | $10^{43}$              | Resistance of <i>E. coli</i> to low pH (mM)                                                                                                                                      |
| $b_{Rp}$       | $10^{32}$              | Resistance of <i>R. palustris</i> to low pH (mM)                                                                                                                                 |
| $Y_G$          | $8 \times 10^7$        | Glucose-limited <i>E. coli</i> growth yield (cells / $\mu$ mol glucose); Glucose-limited <i>E. coli</i> culture                                                                  |
| $Y_A$          | $1 \times 10^9$        | $NH_4^+$ -limited <i>E. coli</i> growth yield (cells / $\mu$ mol $NH_4^+$ ); $NH_4^+$ -limited <i>E. coli</i> culture                                                            |
| $Y_C$          | $2.5 \times 10^8$      | Organic acid-limited <i>R. palustris</i> growth yield (cells / $\mu$ mol organic acid); Acetate-limited <i>R. palustris</i> culture                                              |
| $Y_N$          | $5 \times 10^8$        | $N_2$ -limited <i>R. palustris</i> growth yield cells / $\mu$ mol $N_2$ ; $N_2$ -limited <i>R. palustris</i> culture                                                             |
| $R_C$          | $1.9 \times 10^{-8}$   | Fraction of glucose converted to organic acids ( $\mu$ mol glucose / cell)                                                                                                       |
| $R_f$          | $8 \times 10^{-9}$     | Fraction of glucose converted to formate ( $\mu$ mol glucose / cell)                                                                                                             |
| $R_e$          | $4.5 \times 10^{-9}$   | Fraction of glucose converted to ethanol ( $\mu$ mol glucose / cell)                                                                                                             |
| $R_{CO2}$      | $5 \times 10^{-10}$    | Fraction of glucose converted to $CO_2$ ( $\mu$ mol glucose / cell)                                                                                                              |
| $R_{HRp}$      | $2 \times 10^{-9}$     | <i>R. palustris</i> $H_2$ production ( $\mu$ mol $H_2$ / <i>R. palustris</i> cell)                                                                                               |
| $R_{HEc}$      | $5 \times 10^{-9}$     | <i>E. coli</i> $H_2$ production ( $\mu$ mol $H_2$ / <i>E. coli</i> cell)                                                                                                         |
| $R_A$          | $0.15 \times 10^{-9}$  | <i>R. palustris</i> $NH_4^+$ production ( $\mu$ mol $NH_4^+$ / cell)                                                                                                             |
| $r_C$          | $300 \times 10^{-11}$  | <i>E. coli</i> specific growth-independent rate of glucose conversion to consumable organic acids ( $\mu$ mol glucose / cell / h) (33)                                           |
| $r_f$          | $47 \times 10^{-11}$   | <i>E. coli</i> specific growth-independent rate of glucose conversion to formate ( $\mu$ mol glucose / cell / h) (33)                                                            |
| $r_e$          | $15 \times 10^{-11}$   | <i>E. coli</i> specific growth-independent rate of glucose conversion to ethanol ( $\mu$ mol glucose / cell / h) (33)                                                            |
| $r_{CO2}$      | $2 \times 10^{-11}$    | <i>E. coli</i> specific growth-independent rate of glucose conversion to $CO_2$ ( $\mu$ mol glucose / cell / h) (33)m                                                            |
| $r_H$          | $2 \times 10^{-11}$    | <i>E. coli</i> specific growth-independent rate of $H_2$ production ( $\mu$ mol $H_2$ / cell / h) (33)                                                                           |
| $r_{C\_mono}$  | $1.2 \times 10^{-11}$  | <i>E. coli</i> specific growth-independent rate of glucose conversion to consumable organic acids when consumable organic acids accumulate ( $\mu$ mol glucose / cell / h); (26) |
| $r_{f\_mono}$  | $0.83 \times 10^{-11}$ | <i>E. coli</i> specific growth-independent rate of glucose conversion to formate when consumable organic acids accumulate ( $\mu$ mol glucose / cell / h); (26)                  |
| $r_{e\_mono}$  | $0.5 \times 10^{-11}$  | <i>E. coli</i> specific growth-independent rate of glucose conversion to ethanol                                                                                                 |

|                        |                        |                                                                                                                                                                              |
|------------------------|------------------------|------------------------------------------------------------------------------------------------------------------------------------------------------------------------------|
|                        |                        | when consumable organic acids accumulate ( $\mu\text{mol glucose / cell / h}$ ); (26)                                                                                        |
| $r_{\text{co2\_mono}}$ | $1.3 \times 10^{-11}$  | <i>E. coli</i> specific growth-independent rate of glucose conversion to $\text{CO}_2$ when consumable organic acids accumulate ( $\mu\text{mol glucose / cell / h}$ ); (26) |
| $r_{\text{H\_mono}}$   | $0.83 \times 10^{-11}$ | <i>E. coli</i> specific growth-independent rate of glucose conversion to $\text{H}_2$ when consumable organic acids accumulate ( $\mu\text{mol glucose / cell / h}$ ); (26)  |
| $r_{\text{Hp}}$        | $27 \times 10^{-11}$   | <i>R. palustris</i> specific growth-independent rate of $\text{H}_2$ production ( $\mu\text{mol H}_2 / \text{cell / h}$ )                                                    |

621 <sup>a</sup> Increased growth rate in presence of  $\text{NH}_4^+$  versus  $\text{N}_2$  based on the difference in experimentally  
 622 determined growth rates in *R. palustris* monocultures grown with either  $\text{NH}_4^+$  or  $\text{N}_2$  as a nitrogen  
 623 source.

624 <sup>b</sup>  $K_{\text{AR}}$  was assumed to be equivalent to the published *E. coli*  $K_{\text{M}}$  (58) for  $\text{NH}_4^+$  ( $K_{\text{A}}$ ).  
 625  
 626  
 627

628 **Supplementary Table 2. Strains, plasmids, and primers used in this study.**  
 629

| Strain or plasmid                  | Description or Sequence (5'-3');<br>Designation                                         | Source or Purpose                                         |
|------------------------------------|-----------------------------------------------------------------------------------------|-----------------------------------------------------------|
| <b><i>R. palustris</i> strains</b> |                                                                                         |                                                           |
| CGA009                             | Wild-type strain; spontaneous $\text{Cm}^{\text{R}}$ derivative of CGA001               | (51)                                                      |
| CGA4004                            | CGA009 $\Delta hupS \Delta rpa2750$ ; Parent                                            | (26)                                                      |
| CGA4005                            | CGA4004 <i>nifA</i> *; <u>Nx</u>                                                        | (26)                                                      |
| CGA4021                            | CGA4005 $\Delta amtB1 \Delta amtB2$ ; <u>Nx</u><br><u><math>\Delta AmtB</math></u>      | (26)                                                      |
| CGA4026                            | CGA4004 $\Delta amtB1 \Delta amtB2$ ; <u><math>\Delta AmtB1</math></u> ,                | This study                                                |
| <b><i>E. coli</i> strains</b>      |                                                                                         |                                                           |
| MG1655                             | Wild-type K12 strain, <u>WT</u>                                                         | (59)                                                      |
| K-12 JW0441-1                      | Keio collection $\Delta amtB::Km$                                                       | (54)                                                      |
| MG1655 $\Delta AmtB$               | MG1655 $\Delta amtB::Km$ ; <u><math>\Delta AmtB</math></u>                              | This study                                                |
| <b>Plasmids</b>                    |                                                                                         |                                                           |
| pJQnifA16                          | $\text{Gm}^{\text{R}}$ ; WT <i>nifA</i> gene flanked by XbaI/BamHI cloned into pJQ200SK | This study                                                |
| <b>Primers</b>                     |                                                                                         |                                                           |
| ALM6f                              | TTCGTCGCTGAATTGCAACG                                                                    | <i>amtB</i> upstream flanking region ( <i>E. coli</i> )   |
| ALM6r                              | TCAGGAAGGGGTGATGCGTA                                                                    | <i>amtB</i> downstream flanking region ( <i>E. coli</i> ) |
| JBM1                               | CGTCTAGACCGGCGCATCGC                                                                    | <i>nifA16</i> upstream primer; <u>XbaI</u>                |
| JBM6                               | GGGGATCCTGGTTCGCAGAGG                                                                   | <i>nifA16</i> downstream primer; <u>BamHI</u>             |

630

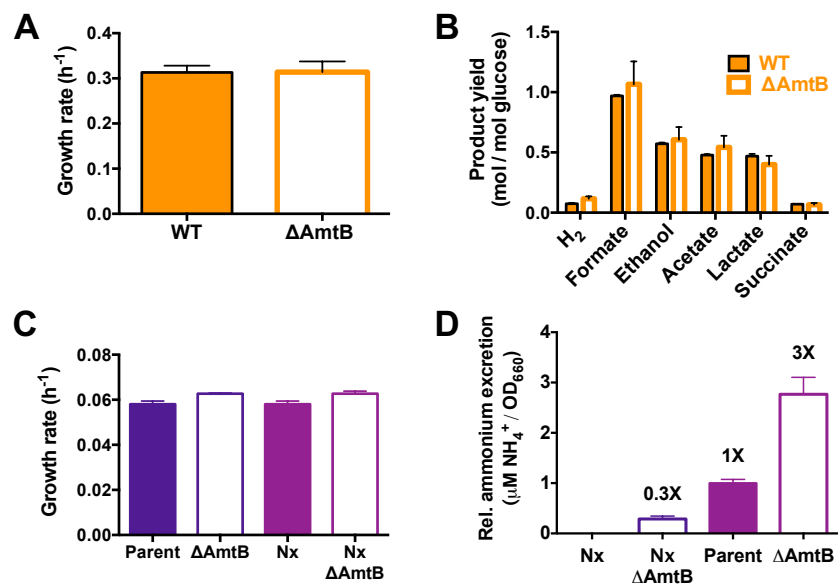

631

632 **Supplementary Fig. 1. *E. coli*  $\Delta\text{AmtB}$  and *R. palustris*  $\Delta\text{AmtB}$  monoculture growth and metabolic**

633 **trends. (A,B)** Growth rates (A) and fermentation product yields (B) from WT *E. coli* (filled) or without

634 (open) *E. coli*  $\Delta\text{AmtB}$  monocultures grown in MDC with 25 mM glucose and 15 mM  $\text{NH}_4\text{Cl}$ .

635 Fermentation profiles were generated from stationary monocultures. Error bars indicate SD, n=3. (C,D)

636 Growth curves (C) and relative  $\text{NH}_4^+$  excretion (D) of *R. palustris* monocultures grown in MDC with 3

637 mM sodium acetate and a 100%  $\text{N}_2$  headspace. Error bars indicate SD, n=4

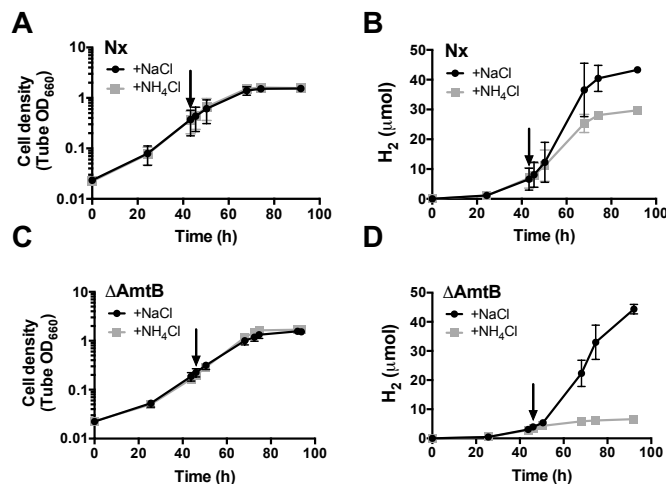

638

639 **Supplementary Fig. 2. *R. palustris*  $\Delta$ AmtB responds to NH<sub>4</sub><sup>+</sup>-induced shutoff of nitrogenase. The**

640 effect of either NH<sub>4</sub>Cl or NaCl on growth (A,C) and H<sub>2</sub> production (B,D) in *R. palustris* Nx or *R.*

641 *palustris*  $\Delta$ AmtB monocultures. *R. palustris* monocultures were grown in MDC with 20 mM sodium

642 acetate and a 100% N<sub>2</sub> headspace until mid-exponential phase and then supplemented with either 15 mM

643 NH<sub>4</sub>Cl or 15 mM NaCl at the time indicated by the arrow.

644

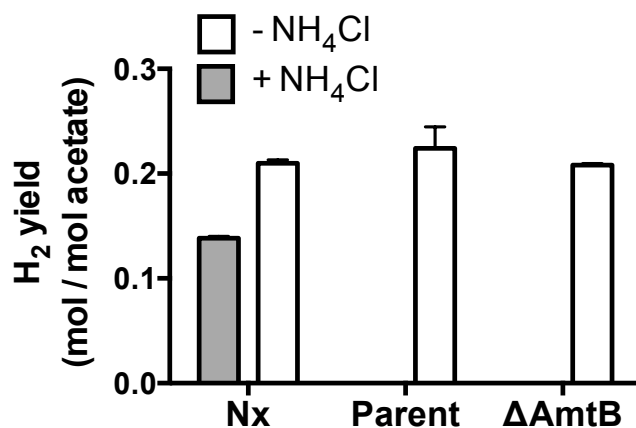

645

646 **Supplementary Fig. 3. Unlike *R. palustris* Nx, *R. palustris*  $\Delta$ AmtB does not produce H<sub>2</sub> when grown**

647 **with NH<sub>4</sub><sup>+</sup>. *R. palustris* monocultures were grown in MDC with 20 mM sodium acetate and a 100% N<sub>2</sub>**

648 headspace with (grey) or without (white) 15mM NH<sub>4</sub>Cl. Samples for determining H<sub>2</sub> yields were taken

649 one week after inoculation, within 24 hours into stationary phase. Error bars indicate SD, n=3.

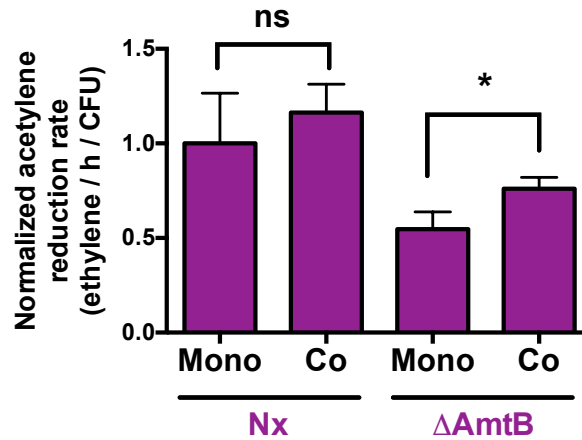

650

651 **Supplementary Fig. 4. *R. palustris*  $\Delta$ AmtB nitrogenase activity increases in coculture.** Normalized

652 nitrogenase activity of *R. palustris* in monoculture (Mono) or coculture (Co) measured by an acetylene

653 reduction assay. Ethylene levels were divided by total *R. palustris* CFUs in the test tube and then

654 normalized to the *R. palustris* Nx monoculture value. Error bars indicate SD, n=4. \*, statistical difference

655 between monoculture and coculture conditions,  $p < 0.05$ , determined using multiple two-tailed t-tests; ns,

656 no significant difference.
